# Supplementary material
Source: MDPI journal article supplement (https://www.mdpi.com/2673-3978/4/1/4)

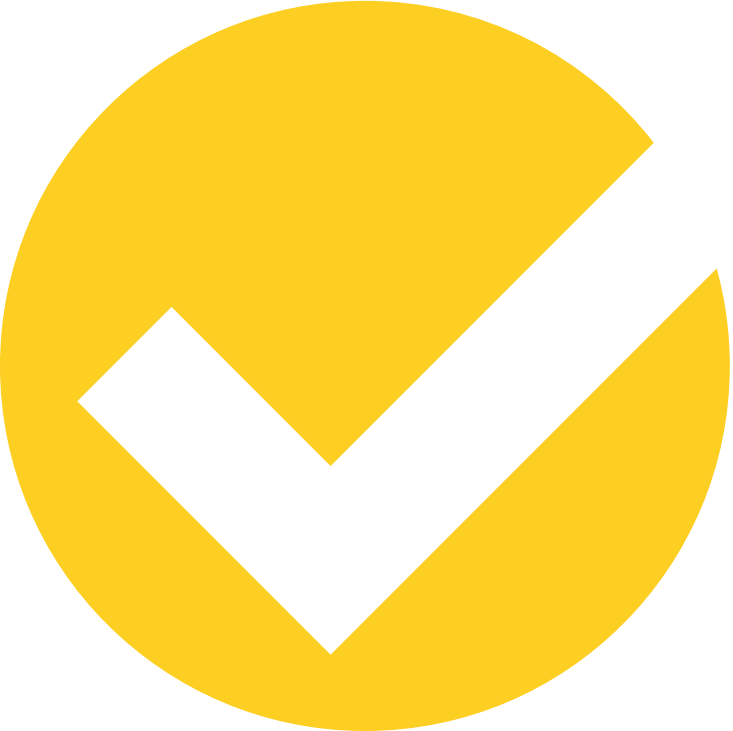

check for  
updates

Supplement: s1 [file s1]

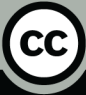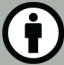

BY

Supplement: s1 [file s1]

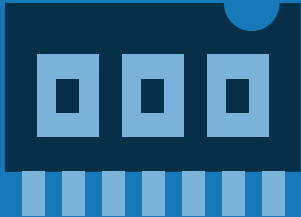

*electronic materials*

Supplement: s1 [file s1]
